# Supplementary material
Source: PubMed Central journal article supplement (PMC3044979)

Fig. S1 S100P does not affect IQGAP1/Cdc42 complex formation. HeLa cells expressing GFP-S100Pwt, GFP-S100P $\Delta$ 21-25 or YFP-S100A10 were serum-starved and stimulated with 50 ng/ml EGF for 5 min. Cells were lysed and the cleared cell lysates were subjected to immunoprecipitation using a polyclonal anti-IQGAP1 antibody (H-108, Santa Cruz Biotechnology). IQGAP1 and co-precipitated Cdc42 were identified by immunoblotting using a monoclonal anti-IQGAP1 antibody (BD Biosciences) and a polyclonal anti-Cdc42-antibody (sc-87, Santa Cruz Biotechnology).

Figure S1

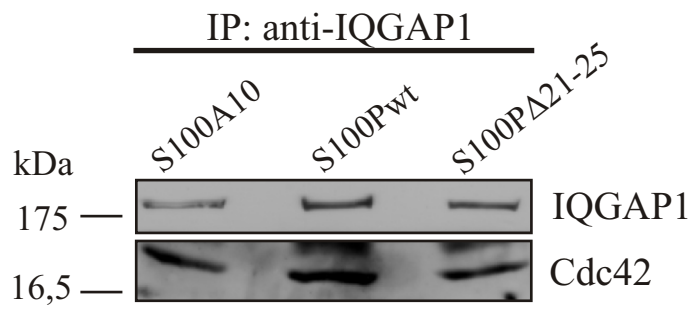

Supplement: supp_M110.135095_jbc.M110.135095-1.pdf [file supp_M110.135095_jbc.M110.135095-1.pdf]
